# Supplementary material for: Novel core–shell dextran–hemin crosslinked micelles: synthesis, photo-controlled drug release and excellent (synergetic) antitumor effect
Source: Royal Society of Chemistry journal article supplement (doi:10.1039/c4tb01575d), 2014-12-23
Supplement: c4tb01575d1.pdf [file c4tb01575d1.pdf]

## A novel core-shell dextran-hemin crosslinked micelles: synthesis, photo-controlled drug release and excellent (synergetic) antitumor effect

Qingbo Yu,<sup>a,b</sup> Anjian Xie,<sup>\*a</sup> Yazhong Xiao,<sup>c</sup> Shikuo Li,<sup>a</sup> Fangzhi Huang,<sup>a</sup> and Yuhua Shen<sup>\*a,c</sup>

<sup>a</sup> School of Chemistry and Chemical Engineering, Anhui University, Hefei 230601, P. R. China

<sup>b</sup> A Department of Materials Science and Engineering, Anhui University of Science and

Technology, Huainan 232001, P. R. China. <sup>c</sup> Collaborative innovation center of modern bio-manufacture, Anhui University, Hefei 230601, P. R. China

E-mail: anjx@ahu.edu.cn, s\_yuhua@163.com

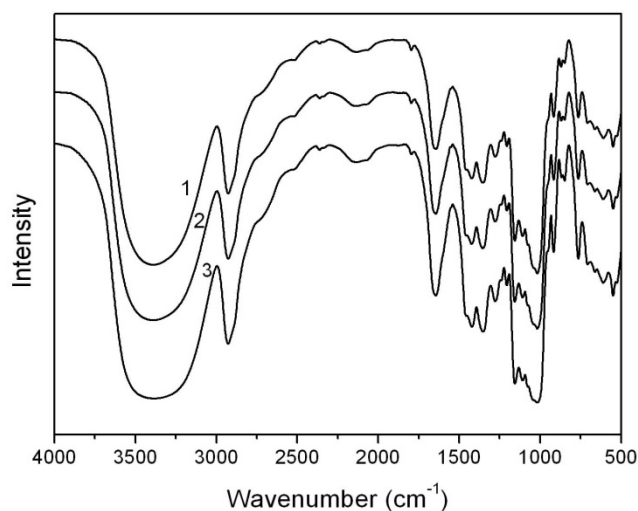

Figure S1 FTIR spectra of dextran measured at different irradiation times, (1) 0 min, (2) 5 min and (3) 10 min.

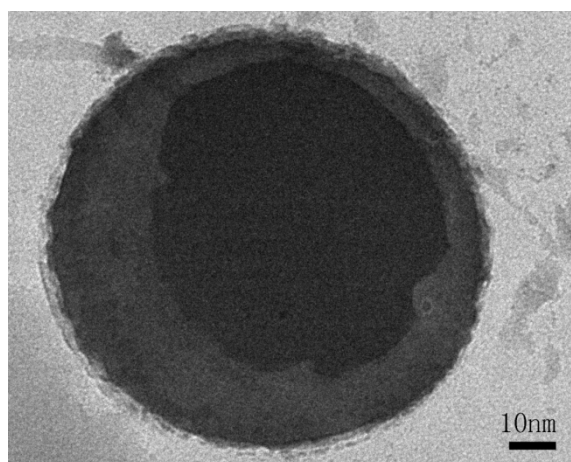

Figure S2 TEM image of Dex-H crosslinked micelle.
